# Supplementary material for: Facet-dependent lithium intercalation into Si crystals: Si(100) vs. Si(111)
Source: Royal Society of Chemistry journal article supplement (doi:10.1039/c1cp22026h), 2011-01-01

*Supplementary Material for*

# **Facet-Dependent Lithium Intercalation into Si Crystal:**

## **Si(100) vs. Si(111)**

*Sung Chul Jung and Young-Kyu Han\**

Computational chemistry laboratory, Korea Basic Science Institute, Daejeon 305-333,

Republic of Korea

**Table S1.** Binding energies ( $E_b$ ) of Li on the T4 and T4' sites of Si(100) and diffusion barriers ( $E_d$ ) of Li for pathways connecting the T4 and T4' sites.  $N_{\text{layer}}$ ,  $d_{\text{vacuum}}$ ,  $k$ -point mesh, and  $E_{\text{cut}}$  represent the number of Si layers in the slab, the vacuum spacing between the slabs, the subdivisions of the ( $4 \times 2$ ) surface Brillouin zone, and the plane-wave cut-off energy, respectively.  $\Delta E_b$  represents the difference between the T4 and T4' binding energies. The energy units are given in eV.

| $N_{\text{layer}}$ | $d_{\text{vacuum}}$ (Å) | $k$ -point mesh | $E_{\text{cut}}$ | $E_b$ |       | $\Delta E_b$ | $E_d$                |                      |
|--------------------|-------------------------|-----------------|------------------|-------|-------|--------------|----------------------|----------------------|
|                    |                         |                 |                  | T4    | T4'   |              | T4 $\rightarrow$ T4' | T4' $\rightarrow$ T4 |
| 14                 | 12.2                    | 2×4×1           | 245.3            | 2.383 | 2.262 | 0.121        | 0.364                | 0.243                |
| 18                 | 12.2                    | 2×4×1           | 245.3            | 2.377 | 2.257 | 0.120        | 0.363                | 0.243                |
| 14                 | 14.9                    | 2×4×1           | 245.3            | 2.380 | 2.256 | 0.124        | 0.364                | 0.240                |
| 14                 | 12.2                    | 3×6×1           | 245.3            | 2.465 | 2.349 | 0.116        | 0.367                | 0.251                |
| 14                 | 12.2                    | 2×4×1           | 306.6            | 2.393 | 2.268 | 0.125        | 0.360                | 0.236                |

**Table S2.** Binding energies ( $E_b$ ) of Li at the surface and subsurface sites of Si(100) and Si(111).

$d_{\text{Li-Si}}$  denotes the average distance between the Li atom and its nearest Si atoms.

| Si(100)  |             |                        | Si(111)  |             |                        |
|----------|-------------|------------------------|----------|-------------|------------------------|
| Sites    | $E_b$ (eV)  | $d_{\text{Li-Si}}$ (Å) | Sites    | $E_b$ (eV)  | $d_{\text{Li-Si}}$ (Å) |
| T4 (T4') | 2.38 (2.26) | 2.63 (2.77)            | H3 (H3') | 2.42 (2.02) | 2.55 (2.64)            |
| S1 (S1') | 1.85 (1.82) | 2.43 (2.50)            | S1 (S1') | 1.77 (1.74) | 2.44 (2.51)            |
| S2       | 1.77        | 2.46                   | S2       | 1.75        | 2.46                   |
| S3       | 1.68        | 2.47                   | S3       | 1.46        | 2.46                   |
| S4       | 1.59        | 2.45                   | S4       | 1.46        | 2.47                   |
| S5       | 1.55        | 2.45                   | S5       | 1.30        | 2.45                   |
| bulk     | 1.28        | 2.45                   | bulk     | 1.28        | 2.45                   |

**Fig. S1.** Surface geometries of (a) Si(100)-c( $4 \times 2$ ) and (b) Si(100)-p( $2 \times 2$ ). In (a) and (b), the T4 sites have different nearest neighbors: two up Si atoms in c( $4 \times 2$ ) and one up Si and one down Si atoms in p( $2 \times 2$ ).

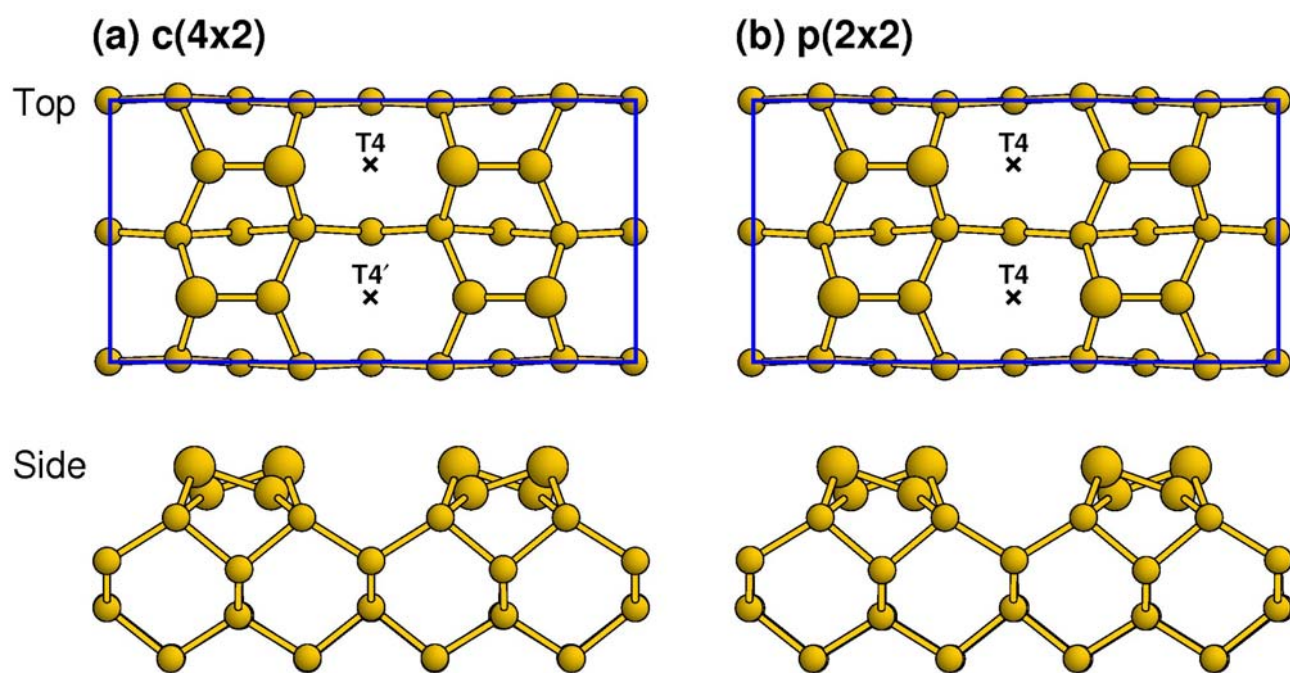

Supplement: c1cp22026h.pdf [file c1cp22026h.pdf]
